# Supplementary material
Source: publisher figshare collection journal article supplement (https://gsajournals.figshare.com/ndownloader/files/24760406)
Supplement: Supplementary file 1 [file 24760406]

## Sheet: network.total#connections
S3. Interaction Network Details.
Gene Symbol	Gene Name	FBID Key	Candidate	Total # Connections	Unique # Connections
ex	expanded	FBgn0004583	yes	31	18
peb	pebbled	FBgn0003053	yes	20	17
faf	fat facets	FBgn0005632	yes	16	16
Sin3A	Sin3A	FBgn0022764	yes	18	15
Imp	IGF-II mRNA-binding protein	FBgn0285926	yes	16	14
sli	slit	FBgn0264089	yes	18	13
Tao	Tao	FBgn0031030	yes	16	11
hiw	highwire	FBgn0030600	yes	12	10
if	inflated	FBgn0001250	yes	16	9
klu	klumpfuss	FBgn0013469	yes	12	9
Tlk	Tousled-like kinase	FBgn0283657	yes	16	9
Rab6	Rab6	FBgn0015797	yes	8	8
Traf4	TNF-receptor-associated factor 4	FBgn0026319	yes	12	8
RhoGAP18B	Rho GTPase activating protein at 18B	FBgn0261461	yes	8	7
Ras85D	Ras oncogene at 85D	FBgn0003205	no	7	6
Dredd	Death related ced-3/Nedd2-like caspase	FBgn0020381	yes	5	5
Pvf1	PDGF- and VEGF-related factor 1	FBgn0030964	yes	8	5
tgo	tango	FBgn0264075	yes	7	5
H	Hairless	FBgn0001169	no	6	5
bsk	basket	FBgn0000229	no	5	4
CycE	Cyclin E	FBgn0010382	no	4	4
Diap1	Death-associated inhibitor of apoptosis 1	FBgn0260635	no	4	4
Egfr	Epidermal growth factor receptor	FBgn0003731	no	5	4
N	Notch	FBgn0004647	no	6	4
pnr	pannier	FBgn0003117	no	5	4
Pvr	PDGF- and VEGF-receptor related	FBgn0032006	no	6	4
Atg2	Autophagy-related 2	FBgn0044452	yes	3	3
CG32549	-	FBgn0052549	yes	3	3
lin-28	lin-28	FBgn0035626	yes	4	3
lin-52	lin-52	FBgn0029800	yes	3	3
spict	spichthyin	FBgn0032451	yes	4	3
Vps15	Vacuolar protein sorting 15	FBgn0260935	yes	3	3
aop	anterior open	FBgn0000097	no	3	3
Cdc42	Cdc42	FBgn0010341	no	3	3
drk	downstream of receptor kinase	FBgn0004638	no	3	3
Dsor1	Downstream of raf1	FBgn0010269	no	3	3
hid	head involution defective	FBgn0003997	no	3	3
Jra	Jun-related antigen	FBgn0001291	no	3	3
Lkb1	Lkb1 kinase	FBgn0038167	no	3	3
Myc	Myc	FBgn0262656	no	3	3
p53	p53	FBgn0039044	no	4	3
par-1	par-1	FBgn0260934	no	3	3
pbl	pebble	FBgn0003041	no	3	3
Ppt1	Palmitoyl-protein thioesterase 1	FBgn0030057	no	3	3
rpr	reaper	FBgn0011706	no	3	3
sima	similar	FBgn0266411	no	3	3
tkv	thickveins	FBgn0003716	no	3	3
Asciz	ASCIZ zinc finger protein	FBgn0035407	yes	2	2
CG10420	Sil1 nucleotide exchange factor	FBgn0039296	yes	2	2
CG1806	-	FBgn0030360	yes	2	2
CHES-1-like	Checkpoint suppressor 1-like	FBgn0029504	yes	2	2
Gmap	Golgi microtubule-associated protein	FBgn0027287	yes	2	2
hang	hangover	FBgn0026575	yes	2	2
Ada2b	transcriptional Adaptor 2b	FBgn0037555	no	2	2
Arf79F	ADP ribosylation factor at 79F	FBgn0010348	no	2	2
arm	armadillo	FBgn0000117	no	4	2
asf1	anti-silencing factor 1	FBgn0029094	no	6	2
betaTub56D	beta-Tubulin at 56D	FBgn0284243	no	2	2
Caf1-55	Chromatin assembly factor 1, p55 subunit	FBgn0263979	no	3	2
chic	chickadee	FBgn0000308	no	4	2
Dcp-1	Death caspase-1	FBgn0010501	no	2	2
Df31	Decondensation factor 31	FBgn0022893	no	2	2
dom	domino	FBgn0020306	no	2	2
Dscam1	Down syndrome cell adhesion molecule 1	FBgn0033159	no	2	2
E2f1	E2F transcription factor 1	FBgn0011766	no	2	2
ed	echinoid	FBgn0000547	no	2	2
ft	fat	FBgn0001075	no	3	2
gig	gigas	FBgn0005198	no	2	2
grim	grim	FBgn0015946	no	2	2
hep	hemipterous	FBgn0010303	no	2	2
hpo	hippo	FBgn0261456	no	5	2
imd	immune deficiency	FBgn0013983	no	2	2
Inos	myo-inositol-1-phosphate synthase	FBgn0025885	no	2	2
InR	Insulin-like receptor	FBgn0283499	no	3	2
jing	jing	FBgn0086655	no	2	2
kibra	kibra	FBgn0262127	no	7	2
Kr	Kruppel	FBgn0001325	no	2	2
kst	karst	FBgn0004167	no	3	2
LanA	Laminin A	FBgn0002526	no	3	2
mam	mastermind	FBgn0002643	no	2	2
mars	mars	FBgn0033845	no	4	2
Mec2	Mec2	FBgn0030993	no	2	2
Med	Medea	FBgn0011655	no	2	2
Mer	Merlin	FBgn0086384	no	4	2
mew	multiple edematous wings	FBgn0004456	no	5	2
Mob4	MOB kinase activator 4	FBgn0259483	no	2	2
mys	myospheroid	FBgn0004657	no	6	2
Nsf2	N-ethylmaleimide-sensitive factor 2	FBgn0266464	no	3	2
p23	p23	FBgn0037728	no	2	2
park	parkin	FBgn0041100	no	3	2
puc	puckered	FBgn0243512	no	2	2
px	plexus	FBgn0003175	no	2	2
Rab2	Rab2	FBgn0014009	no	2	2
Rab5	Rab5	FBgn0014010	no	2	2
Rac1	Rac1	FBgn0010333	no	2	2
Rae1	Rae1	FBgn0034646	no	4	2
rhea	rhea	FBgn0260442	no	2	2
Rho1	Rho1	FBgn0014020	no	3	2
rictor	rapamycin-insensitive companion of Tor	FBgn0031006	no	2	2
S6kII	Ribosomal protein S6 kinase II	FBgn0262866	no	2	2
Schip1	Schwannomin interacting protein 1	FBgn0032221	no	3	2
sd	scalloped	FBgn0003345	no	2	2
SERCA	Sarco/endoplasmic reticulum Ca(2+)-ATPase	FBgn0263006	no	2	2
shg	shotgun	FBgn0003391	no	3	2
shi	shibire	FBgn0003392	no	2	2
sim	single-minded	FBgn0004666	no	3	2
sina	seven in absentia	FBgn0003410	no	2	2
sog	short gastrulation	FBgn0003463	no	2	2
tai	taiman	FBgn0041092	no	2	2
vkg	viking	FBgn0016075	no	3	2
wit	wishful thinking	FBgn0024179	no	3	2
wnd	wallenda	FBgn0036896	no	2	2
wts	warts	FBgn0011739	no	7	2
yki	yorkie	FBgn0034970	no	3	2
CG15514	-	FBgn0039712	yes	1	1
dgt5	dim gamma-tubulin 5	FBgn0033740	yes	1	1
EP1388	EP1388	FBgn0062689	yes	1	1
GIIIspla2	Phospholipase A2 group III	FBgn0030013	yes	1	1
grau	grauzone	FBgn0001133	yes	1	1
lov	jim lovell	FBgn0266129	yes	1	1
Naa60	N(alpha)-acetyltransferase 60	FBgn0036039	yes	1	1
ss	spineless	FBgn0003513	yes	2	1
Syx5	Syntaxin 5	FBgn0011708	yes	2	1
